# Supplementary material for: MBD5 and MBD6 stabilize the BAP1 complex and promote BAP1-dependent cancer
Source: Genome Biol. 2022 Sep 30;23:206. doi: 10.1186/s13059-022-02776-x (PMC9523997; doi:10.1186/s13059-022-02776-x)
Supplement: Supplementary file 4 — Additional file 4: Table S3. Mass spectrometry results for GFP-tagged SBA-MBD purification from drosophila S2 cells. [file 13059_2022_2776_MOESM4_ESM.xlsx]

## Sheet: Sheet1
#	Visible?	Starred?	Identified Proteins (183)	Accession Number	Alternate ID	Molecular Weight	Protein Grouping Ambiguity	Taxonomy	GFP	SBA
1	TRUE	Empty	Zipper, isoform C OS=Drosophila melanogaster OX=7227 GN=zip PE=1 SV=1	Q59E58	zip	227 kDa	TRUE	unknown	238	295
2	TRUE	Empty	Myosin heavy chain, non-muscle OS=Drosophila melanogaster OX=7227 GN=zip PE=1 SV=2	Q99323	zip	237 kDa	TRUE	unknown	225	288
3	TRUE	Empty	Heat shock protein cognate 4, isoform G OS=Drosophila melanogaster OX=7227 GN=Hsc70-4 PE=1 SV=1	C7LA75 (+1)	Hsc70-4	71 kDa	TRUE	unknown	12	282
4	TRUE	Empty	Tubulin beta-1 chain OS=Drosophila melanogaster OX=7227 GN=betaTub56D PE=1 SV=2	Q24560	betaTub56D	50 kDa	TRUE	unknown	4	119
5	TRUE	Empty	Heat shock 70-kDa protein cognate 3, isoform E OS=Drosophila melanogaster OX=7227 GN=Hsc70-3 PE=1 SV=1	F3YDH0 (+1)	Hsc70-3	72 kDa	TRUE	unknown	20	109
6	TRUE	Empty	Heat shock protein cognate 5, isoform B OS=Drosophila melanogaster OX=7227 GN=Hsc70-5 PE=3 SV=1	A0A0B4LFD2 (+1)	Hsc70-5	74 kDa	TRUE	unknown	6	134
7	TRUE	Empty	Six-banded, isoform G OS=Drosophila melanogaster OX=7227 GN=sba PE=4 SV=1	A0A0C4DHB2 (+1)	sba	146 kDa		unknown	0	120
8	TRUE	Empty	Actin-5C OS=Drosophila melanogaster OX=7227 GN=Act5C PE=1 SV=4	P10987 (+1)	Act5C	42 kDa	TRUE	unknown	37	54
9	TRUE	Empty	Elongation factor 1-alpha 1 OS=Drosophila melanogaster OX=7227 GN=eEF1alpha1 PE=1 SV=2	P08736	eEF1alpha1	50 kDa		unknown	3	58
10	TRUE	Empty	Tubulin alpha-1 chain OS=Drosophila melanogaster OX=7227 GN=alphaTub84B PE=1 SV=1	P06603 (+1)	alphaTub84B	50 kDa		unknown	0	62
11	TRUE	Empty	Succinate dehydrogenase [ubiquinone] flavoprotein subunit, mitochondrial OS=Drosophila melanogaster OX=7227 GN=SdhA PE=2 SV=3	Q94523	SdhA	72 kDa		unknown	0	20
12	TRUE	Empty	Heat shock protein 83, isoform B OS=Drosophila melanogaster OX=7227 GN=Hsp83 PE=3 SV=1	M9PBL3 (+1)	Hsp83	82 kDa		unknown	0	51
13	TRUE	Empty	Elongation factor 2 OS=Drosophila melanogaster OX=7227 GN=EF2 PE=1 SV=4	P13060	EF2	94 kDa		unknown	0	25
14	TRUE	Empty	Aldehyde dehydrogenase OS=Drosophila melanogaster OX=7227 GN=Aldh PE=1 SV=1	Q9VLC5	Aldh	57 kDa		unknown	0	51
15	TRUE	Empty	Ubiquitin-63E, isoform C OS=Drosophila melanogaster OX=7227 GN=Ubi-p63E PE=4 SV=1	A4V1F9 (+5)	Ubi-p63E	86 kDa		unknown	6	36
16	TRUE	Empty	Heat shock protein 68 OS=Drosophila melanogaster OX=7227 GN=Hsp68 PE=1 SV=1	O97125	Hsp68	70 kDa	TRUE	unknown	0	42
17	TRUE	Empty	ATP synthase subunit beta OS=Drosophila melanogaster OX=7227 GN=ATPsynbeta PE=1 SV=1	L0MQ04 (+2)	ATPsynbeta	55 kDa		unknown	8	29
18	TRUE	Empty	Pyruvate kinase OS=Drosophila melanogaster OX=7227 GN=PyK PE=2 SV=2	O62619	PyK	57 kDa		unknown	0	31
19	TRUE	Empty	VAMP-associated protein 33kDa, isoform A OS=Drosophila melanogaster OX=7227 GN=Vap33 PE=1 SV=1	Q7KVX5 (+1)	Vap33	27 kDa		unknown	0	7
20	TRUE	Empty	Additional sex combs, isoform C OS=Drosophila melanogaster OX=7227 GN=Asx PE=4 SV=1	A0A0B4KFX9 (+1)	Asx	180 kDa		unknown	0	35
21	TRUE	Empty	Calcium-transporting ATPase sarcoplasmic/endoplasmic reticulum type OS=Drosophila melanogaster OX=7227 GN=SERCA PE=1 SV=2	P22700	SERCA	112 kDa		unknown	0	28
22	TRUE	Empty	ATP synthase subunit alpha, mitochondrial OS=Drosophila melanogaster OX=7227 GN=blw PE=1 SV=2	P35381	blw	59 kDa		unknown	0	19
23	TRUE	Empty	Clathrin heavy chain OS=Drosophila melanogaster OX=7227 GN=Chc PE=1 SV=1	P29742 (+1)	Chc	191 kDa		unknown	0	17
24	TRUE	Empty	Stress-sensitive B, isoform E OS=Drosophila melanogaster OX=7227 GN=sesB PE=1 SV=1	X2JB48	sesB	33 kDa		unknown	0	21
25	TRUE	Empty	EG:133E12.4 protein OS=Drosophila melanogaster OX=7227 GN=east PE=1 SV=1	O46048 (+1)	east	250 kDa		unknown	0	0
26	TRUE	Empty	Karst, isoform E OS=Drosophila melanogaster OX=7227 GN=kst PE=1 SV=2	A8JNJ6 (+2)	kst	498 kDa		unknown	0	1
27	TRUE	Empty	UDP-glucose 4-epimerase OS=Drosophila melanogaster OX=7227 GN=Gale PE=1 SV=1	M9ND19 (+1)	Gale	39 kDa		unknown	0	11
28	TRUE	Empty	GH12731p OS=Drosophila melanogaster OX=7227 GN=Gfat2 PE=1 SV=1	Q9VAW3	Gfat2	77 kDa		unknown	0	17
29	TRUE	Empty	Succinate dehydrogenase [ubiquinone] iron-sulfur subunit, mitochondrial OS=Drosophila melanogaster OX=7227 GN=SdhB PE=2 SV=2	P21914	SdhB	34 kDa		unknown	0	1
30	TRUE	Empty	Proteasome subunit alpha type OS=Drosophila melanogaster OX=7227 GN=Dmel\CG30382 PE=1 SV=1	E1JGZ9 (+1)	Dmel	27 kDa		unknown	0	22
31	TRUE	Empty	Ras opposite, isoform B OS=Drosophila melanogaster OX=7227 GN=Rop PE=3 SV=1	M9PEL1 (+1)	Rop	68 kDa		unknown	0	0
32	TRUE	Empty	A kinase anchor protein 200, isoform D OS=Drosophila melanogaster OX=7227 GN=Akap200 PE=1 SV=1	Q86BM5 (+1)	Akap200	88 kDa		unknown	3	10
33	TRUE	Empty	Glycogen [starch] synthase OS=Drosophila melanogaster OX=7227 GN=GlyS PE=1 SV=1	A0A0B4KHJ5 (+1)	GlyS	79 kDa		unknown	0	7
34	TRUE	Empty	Heat shock protein 60A OS=Drosophila melanogaster OX=7227 GN=Hsp60A PE=1 SV=3	O02649	Hsp60A	61 kDa		unknown	0	20
35	TRUE	Empty	AT02348p OS=Drosophila melanogaster OX=7227 GN=UQCR-C2 PE=1 SV=1	Q9VV75	UQCR-C2	45 kDa		unknown	0	16
36	TRUE	Empty	Proteasome subunit alpha type OS=Drosophila melanogaster OX=7227 GN=Prosalpha6 PE=2 SV=1	I0DHK3 (+1)	Prosalpha6	31 kDa		unknown	0	19
37	TRUE	Empty	EG:25E8.1 protein OS=Drosophila melanogaster OX=7227 GN=GRP170 PE=1 SV=1	O46067	GRP170	103 kDa		unknown	0	20
38	TRUE	Empty	Proteasome assembly chaperone 2 OS=Drosophila melanogaster OX=7227 GN=Dmel\CG12321 PE=1 SV=1	Q9VEC2	Dmel	28 kDa		unknown	0	20
39	TRUE	Empty	60S ribosomal protein L4 OS=Drosophila melanogaster OX=7227 GN=RpL4 PE=1 SV=2	P09180	RpL4	45 kDa		unknown	0	12
40	TRUE	Empty	Thioester-containing protein 4, isoform C OS=Drosophila melanogaster OX=7227 GN=Tep4 PE=1 SV=1	M9PDR0 (+1)	Tep4	169 kDa		unknown	0	20
41	TRUE	Empty	Eukaryotic translation initiation factor 4A, isoform E OS=Drosophila melanogaster OX=7227 GN=eIF4A PE=1 SV=1	C9QP42 (+1)	eIF4A	46 kDa		unknown	0	12
42	TRUE	Empty	40S ribosomal protein S3a OS=Drosophila melanogaster OX=7227 GN=RpS3A PE=1 SV=4	P55830	RpS3A	30 kDa		unknown	0	9
43	TRUE	Empty	Catalase OS=Drosophila melanogaster OX=7227 GN=Cat PE=1 SV=2	P17336	Cat	57 kDa		unknown	0	7
44	TRUE	Empty	Cathepsin L OS=Drosophila melanogaster OX=7227 GN=Cp1 PE=2 SV=2	Q95029	Cp1	42 kDa		unknown	0	10
45	TRUE	Empty	Hsc70Cb, isoform G OS=Drosophila melanogaster OX=7227 GN=Hsc70Cb PE=1 SV=1	M9MSL3	Hsc70Cb	92 kDa		unknown	0	16
46	TRUE	Empty	Glutamate oxaloacetate transaminase 1, isoform A OS=Drosophila melanogaster OX=7227 GN=Got1 PE=1 SV=1	Q7K221	Got1	46 kDa		unknown	0	0
47	TRUE	Empty	Protein Notchless OS=Drosophila melanogaster OX=7227 GN=Nle PE=1 SV=2	Q9VPR4	Nle	54 kDa		unknown	0	0
48	TRUE	Empty	LD30155p OS=Drosophila melanogaster OX=7227 GN=lost PE=1 SV=1	Q9VN21	lost	60 kDa		unknown	0	9
49	TRUE	Empty	Probable tRNA (guanine(26)-N(2))-dimethyltransferase OS=Drosophila melanogaster OX=7227 GN=CG6388 PE=2 SV=1	Q9VK89	CG6388	65 kDa		unknown	0	0
50	TRUE	Empty	Chaperonin containing TCP1 subunit 1, isoform B OS=Drosophila melanogaster OX=7227 GN=CCT1 PE=1 SV=1	A4V391 (+1)	CCT1	60 kDa		unknown	0	11
51	TRUE	Empty	Alpha spectrin, isoform C OS=Drosophila melanogaster OX=7227 GN=alpha-Spec PE=4 SV=1	M9PBI5 (+1)	alpha-Spec	281 kDa		unknown	0	0
52	TRUE	Empty	Proteasome subunit alpha type-3 OS=Drosophila melanogaster OX=7227 GN=Prosalpha7 PE=1 SV=1	Q9V5C6	Prosalpha7	28 kDa		unknown	0	15
53	TRUE	Empty	Ribosomal protein S3, isoform B OS=Drosophila melanogaster OX=7227 GN=RpS3 PE=1 SV=1	G3M3A2 (+1)	RpS3	27 kDa		unknown	0	11
54	TRUE	Empty	Coatomer subunit alpha OS=Drosophila melanogaster OX=7227 GN=alphaCOP PE=1 SV=1	Q9W0B8	alphaCOP	139 kDa		unknown	0	4
55	TRUE	Empty	Ribosomal protein S2, isoform B OS=Drosophila melanogaster OX=7227 GN=RpS2 PE=3 SV=1	M9PB84 (+1)	RpS2	29 kDa		unknown	0	6
56	TRUE	Empty	CG3595 OS=Drosophila melanogaster OX=7227 GN=sqh PE=1 SV=1	F6J1D0 (+1)	sqh	20 kDa		unknown	10	3
57	TRUE	Empty	T-complex protein 1 subunit gamma OS=Drosophila melanogaster OX=7227 GN=CCT3 PE=1 SV=1	A4V303 (+1)	CCT3	59 kDa		unknown	0	7
58	TRUE	Empty	Porin, isoform D OS=Drosophila melanogaster OX=7227 GN=porin PE=4 SV=1	M9PD75 (+1)	porin	31 kDa		unknown	0	7
59	TRUE	Empty	Blanks OS=Drosophila melanogaster OX=7227 GN=blanks PE=1 SV=1	Q9VRL8	blanks	36 kDa		unknown	0	5
60	TRUE	Empty	FI07923p OS=Drosophila melanogaster OX=7227 GN=Karybeta3 PE=1 SV=1	Q9VN44	Karybeta3	124 kDa		unknown	0	4
61	TRUE	Empty	GTP-binding nuclear protein OS=Drosophila melanogaster OX=7227 GN=Ran PE=1 SV=1	A4V4A5 (+1)	Ran	25 kDa		unknown	0	6
62	TRUE	Empty	ATP synthase subunit gamma, mitochondrial OS=Drosophila melanogaster OX=7227 GN=ATPsyngamma PE=2 SV=2	O01666	ATPsyngamma	33 kDa		unknown	0	10
63	TRUE	Empty	Actin-related protein 3 OS=Drosophila melanogaster OX=7227 GN=Arp3 PE=2 SV=3	P32392	Arp3	47 kDa		unknown	7	2
64	TRUE	Empty	40S ribosomal protein S7 OS=Drosophila melanogaster OX=7227 GN=RpS7 PE=1 SV=2	Q8IMI7 (+1)	RpS7	22 kDa		unknown	0	10
65	TRUE	Empty	Prohibitin OS=Drosophila melanogaster OX=7227 GN=Phb2 PE=1 SV=1	A8DYI6 (+2)	Phb2	37 kDa		unknown	0	10
66	TRUE	Empty	Dolichyl-diphosphooligosaccharide--protein glycosyltransferase 48 kDa subunit OS=Drosophila melanogaster OX=7227 GN=Ost48 PE=2 SV=2	Q24319	Ost48	50 kDa		unknown	0	11
67	TRUE	Empty	ATP-citrate synthase OS=Drosophila melanogaster OX=7227 GN=ATPCL PE=1 SV=1	Q7KN85	ATPCL	121 kDa		unknown	0	12
68	TRUE	Empty	60S acidic ribosomal protein P0 OS=Drosophila melanogaster OX=7227 GN=RpLP0 PE=3 SV=1	M9PG76 (+1)	RpLP0	34 kDa		unknown	3	8
69	TRUE	Empty	Fimbrin OS=Drosophila melanogaster OX=7227 GN=Fim PE=1 SV=1	O61604	Fim	72 kDa		unknown	0	8
70	TRUE	Empty	MIP33436p1 OS=Drosophila melanogaster OX=7227 GN=Pp2A-29B PE=1 SV=1	H5V8B8 (+3)	Pp2A-29B	72 kDa		unknown	0	5
71	TRUE	Empty	Chaperonin containing TCP1 subunit 8 OS=Drosophila melanogaster OX=7227 GN=CCT8 PE=1 SV=1	Q7K3J0	CCT8	59 kDa		unknown	0	8
72	TRUE	Empty	Ribosomal protein S19a, isoform C OS=Drosophila melanogaster OX=7227 GN=RpS19a PE=1 SV=1	E2QD65 (+1)	RpS19a	17 kDa		unknown	0	8
73	TRUE	Empty	Tropomyosin 1, isoform Q OS=Drosophila melanogaster OX=7227 GN=Tm1 PE=1 SV=1	A0A0B4K661 (+1)	Tm1	29 kDa		unknown	2	2
74	TRUE	Empty	Dolichyl-diphosphooligosaccharide--protein glycosyltransferase subunit 2 OS=Drosophila melanogaster OX=7227 GN=OstDelta PE=1 SV=1	Q7K110	OstDelta	69 kDa		unknown	0	7
75	TRUE	Empty	Dolichyl-diphosphooligosaccharide--protein glycosyltransferase subunit 1 OS=Drosophila melanogaster OX=7227 GN=CG5364 PE=1 SV=1	Q76NQ0	CG5364	52 kDa		unknown	0	10
76	TRUE	Empty	Phosphoglucomutase 2a OS=Drosophila melanogaster OX=7227 GN=Pgm2a PE=1 SV=1	A1Z7P1	Pgm2a	70 kDa		unknown	0	0
77	TRUE	Empty	Mitogen-activated protein kinase OS=Drosophila melanogaster OX=7227 GN=bsk PE=1 SV=1	E1JHD6 (+1)	bsk	43 kDa		unknown	0	0
78	TRUE	Empty	GrpE protein homolog, mitochondrial OS=Drosophila melanogaster OX=7227 GN=Roe1 PE=2 SV=2	P48604	Roe1	24 kDa		unknown	0	11
79	TRUE	Empty	F-box-like/WD repeat-containing protein ebi OS=Drosophila melanogaster OX=7227 GN=ebi PE=1 SV=2	Q95RJ9	ebi	72 kDa		unknown	0	0
80	TRUE	Empty	Ribosomal protein S10b, isoform D OS=Drosophila melanogaster OX=7227 GN=RpS10b PE=1 SV=1	M9NEQ9 (+1)	RpS10b	18 kDa		unknown	1	6
81	TRUE	Empty	Asparaginyl-tRNA synthetase, isoform A OS=Drosophila melanogaster OX=7227 GN=AsnRS PE=1 SV=1	Q9V434	AsnRS	64 kDa		unknown	0	8
82	TRUE	Empty	40S ribosomal protein S5a OS=Drosophila melanogaster OX=7227 GN=RpS5a PE=1 SV=1	Q24186 (+1)	RpS5a	25 kDa		unknown	0	8
83	TRUE	Empty	40S ribosomal protein S4 OS=Drosophila melanogaster OX=7227 GN=RpS4 PE=1 SV=2	P41042 (+1)	RpS4	29 kDa		unknown	0	8
84	TRUE	Empty	40S ribosomal protein S18 OS=Drosophila melanogaster OX=7227 GN=RpS18 PE=1 SV=1	P41094	RpS18	18 kDa		unknown	0	8
85	TRUE	Empty	Proteasome subunit alpha type-5 OS=Drosophila melanogaster OX=7227 GN=Prosalpha5 PE=2 SV=2	Q95083	Prosalpha5	27 kDa		unknown	0	8
86	TRUE	Empty	Transgelin OS=Drosophila melanogaster OX=7227 GN=Chd64 PE=1 SV=1	M9PE30 (+1)	Chd64	19 kDa		unknown	0	4
87	TRUE	Empty	CathD, isoform A OS=Drosophila melanogaster OX=7227 GN=cathD PE=1 SV=1	Q7K485	cathD	42 kDa		unknown	0	3
88	TRUE	Empty	LD23561p OS=Drosophila melanogaster OX=7227 GN=Dmel\CG5854 PE=1 SV=1	Q9VCF8	Dmel	42 kDa		unknown	0	1
89	TRUE	Empty	D-Importin 7/RanBP7 OS=Drosophila melanogaster OX=7227 GN=msk PE=1 SV=1	Q9VSD6	msk	119 kDa		unknown	0	8
90	TRUE	Empty	Collagen alpha-1(IV) chain OS=Drosophila melanogaster OX=7227 GN=Col4a1 PE=1 SV=3	P08120	Col4a1	174 kDa		unknown	3	7
91	TRUE	Empty	Eukaryotic translation initiation factor 4G1, isoform B OS=Drosophila melanogaster OX=7227 GN=eIF4G1 PE=1 SV=1	A8DZ29	eIF4G1	211 kDa		unknown	0	8
92	TRUE	Empty	Protein SEC13 homolog OS=Drosophila melanogaster OX=7227 GN=Sec13 PE=1 SV=1	Q9V3J4	Sec13	40 kDa		unknown	0	4
93	TRUE	Empty	Ribosomal protein L11, isoform B OS=Drosophila melanogaster OX=7227 GN=RpL11 PE=1 SV=1	A0A0B4LGZ5 (+1)	RpL11	21 kDa		unknown	0	5
94	TRUE	Empty	Secretory 24CD, isoform C OS=Drosophila melanogaster OX=7227 GN=Sec24CD PE=1 SV=1	M9PC99 (+1)	Sec24CD	134 kDa		unknown	0	6
95	TRUE	Empty	Chaperonin containing TCP1 subunit 2 OS=Drosophila melanogaster OX=7227 GN=CCT2 PE=1 SV=2	Q9W392	CCT2	58 kDa		unknown	0	4
96	TRUE	Empty	Eukaryotic translation initiation factor 2 subunit gamma, isoform D OS=Drosophila melanogaster OX=7227 GN=eIF2gamma PE=1 SV=1	A0A0B4KGP8 (+1)	eIF2gamma	51 kDa		unknown	0	9
97	TRUE	Empty	MIP15344p OS=Drosophila melanogaster OX=7227 GN=RpL28 PE=1 SV=1	D1Z3A1 (+1)	RpL28	16 kDa		unknown	2	5
98	TRUE	Empty	F-actin-capping protein subunit alpha OS=Drosophila melanogaster OX=7227 GN=cpa PE=2 SV=1	Q9W2N0	cpa	33 kDa		unknown	5	4
99	TRUE	Empty	FI01544p OS=Drosophila melanogaster OX=7227 GN=Rab1 PE=1 SV=1	O18332	Rab1	23 kDa	TRUE	unknown	0	5
100	TRUE	Empty	Serine/threonine-protein phosphatase PP2A OS=Drosophila melanogaster OX=7227 GN=mts PE=2 SV=1	P23696 (+1)	mts	35 kDa		unknown	0	3
101	TRUE	Empty	Glycoprotein 93 OS=Drosophila melanogaster OX=7227 GN=Gp93 PE=1 SV=1	Q9VAY2	Gp93	90 kDa		unknown	0	8
102	TRUE	Empty	GH13924p OS=Drosophila melanogaster OX=7227 GN=PSMG1 PE=1 SV=1	Q9VNI4	PSMG1	26 kDa		unknown	0	9
103	TRUE	Empty	Dodeca-satellite-binding protein 1, isoform A OS=Drosophila melanogaster OX=7227 GN=Dp1 PE=1 SV=1	Q7KN75	Dp1	144 kDa		unknown	0	4
104	TRUE	Empty	LP21249p OS=Drosophila melanogaster OX=7227 GN=Psa PE=1 SV=1	Q8IRH0 (+2)	Psa	120 kDa		unknown	0	3
105	TRUE	Empty	Myosin light chain cytoplasmic, isoform B OS=Drosophila melanogaster OX=7227 GN=Mlc-c PE=4 SV=1	M9NEW1 (+1)	Mlc-c	17 kDa		unknown	2	5
106	TRUE	Empty	Probable isocitrate dehydrogenase [NAD] subunit alpha, mitochondrial OS=Drosophila melanogaster OX=7227 GN=Idh3a PE=2 SV=1	Q9VWH4	Idh3a	41 kDa		unknown	0	5
107	TRUE	Empty	Jaguar, isoform L OS=Drosophila melanogaster OX=7227 GN=jar PE=1 SV=1	A0A0B4KGX1 (+3)	jar	145 kDa	TRUE	unknown	7	0
108	TRUE	Empty	Eukaryotic translation elongation factor 1 gamma, isoform C OS=Drosophila melanogaster OX=7227 GN=eEF1gamma PE=4 SV=1	A0A0B4JD11 (+1)	eEF1gamma	49 kDa		unknown	0	7
109	TRUE	Empty	60S ribosomal protein L13 OS=Drosophila melanogaster OX=7227 GN=RpL13 PE=1 SV=1	M9PFF0 (+1)	RpL13	25 kDa		unknown	0	7
110	TRUE	Empty	GH11341p OS=Drosophila melanogaster OX=7227 GN=Rpn5 PE=1 SV=1	Q9V3Z4	Rpn5	58 kDa		unknown	0	3
111	TRUE	Empty	LD43819p OS=Drosophila melanogaster OX=7227 GN=Dmel\CG1416 PE=1 SV=2	Q9V9Q4	Dmel	40 kDa		unknown	0	5
112	TRUE	Empty	ATP-dependent RNA helicase WM6 OS=Drosophila melanogaster OX=7227 GN=Hel25E PE=1 SV=1	Q27268	Hel25E	49 kDa		unknown	0	5
113	TRUE	Empty	FI06027p OS=Drosophila melanogaster OX=7227 GN=TrpRS PE=1 SV=1	Q0KI98	TrpRS	48 kDa		unknown	0	6
114	TRUE	Empty	Eukaryotic translation initiation factor 3 subunit A OS=Drosophila melanogaster OX=7227 GN=eIF3a PE=1 SV=1	Q9VN25	eIF3a	134 kDa		unknown	0	5
115	TRUE	Empty	DNA helicase OS=Drosophila melanogaster OX=7227 GN=dpa PE=1 SV=1	A0A0B4LEV2 (+1)	dpa	97 kDa		unknown	0	0
116	TRUE	Empty	60S ribosomal protein L3 OS=Drosophila melanogaster OX=7227 GN=RpL3 PE=1 SV=3	O16797	RpL3	47 kDa		unknown	0	6
117	TRUE	Empty	26S proteasome non-ATPase regulatory subunit 6 OS=Drosophila melanogaster OX=7227 GN=Rpn7 PE=2 SV=1	Q9V3G7	Rpn7	45 kDa		unknown	0	7
118	TRUE	Empty	Ubiquitin carboxyl-terminal hydrolase calypso OS=Drosophila melanogaster OX=7227 GN=calypso PE=1 SV=1	Q7K5N4	calypso	52 kDa		unknown	0	6
119	TRUE	Empty	26S proteasome regulatory complex subunit p48B OS=Drosophila melanogaster OX=7227 GN=Rpt1 PE=1 SV=1	Q7KMQ0	Rpt1	49 kDa		unknown	0	6
120	TRUE	Empty	26S proteasome non-ATPase regulatory subunit 2 OS=Drosophila melanogaster OX=7227 GN=Rpn1 PE=1 SV=2	Q9VW54	Rpn1	102 kDa		unknown	0	4
121	TRUE	Empty	Peroxiredoxin 1 OS=Drosophila melanogaster OX=7227 GN=Jafrac1 PE=1 SV=1	Q9V3P0 (+1)	Jafrac1	22 kDa		unknown	0	3
122	TRUE	Empty	Arginase OS=Drosophila melanogaster OX=7227 GN=arg PE=1 SV=2	O76895	arg	39 kDa		unknown	0	3
123	TRUE	Empty	LP20978p OS=Drosophila melanogaster OX=7227 GN=SerRS PE=1 SV=1	Q9VQL1	SerRS	56 kDa		unknown	0	4
124	TRUE	Empty	Eukaryotic translation initiation factor 3 subunit L OS=Drosophila melanogaster OX=7227 GN=eIF3l PE=2 SV=1	Q9VTU4	eIF3l	63 kDa		unknown	0	4
125	TRUE	Empty	Failed axon connections, isoform C OS=Drosophila melanogaster OX=7227 GN=fax PE=1 SV=1	Q59E30 (+1)	fax	47 kDa		unknown	0	3
126	TRUE	Empty	26-29kD-proteinase OS=Drosophila melanogaster OX=7227 GN=26-29-p PE=1 SV=1	Q9V3U6	26-29-p	62 kDa		unknown	0	4
127	TRUE	Empty	Coatomer subunit delta OS=Drosophila melanogaster OX=7227 GN=deltaCOP PE=1 SV=1	Q7K7G0 (+1)	deltaCOP	58 kDa		unknown	0	6
128	TRUE	Empty	Coatomer subunit beta OS=Drosophila melanogaster OX=7227 GN=betaCOP PE=2 SV=2	P45437	betaCOP	107 kDa		unknown	0	3
129	TRUE	Empty	GEO08239p1 OS=Drosophila melanogaster OX=7227 GN=RpS16 PE=2 SV=1	A0A0B4LG52 (+1)	RpS16	17 kDa		unknown	0	4
130	TRUE	Empty	60S ribosomal protein L14 OS=Drosophila melanogaster OX=7227 GN=RpL14 PE=1 SV=1	P55841	RpL14	19 kDa		unknown	0	5
131	TRUE	Empty	Mitogen-activated protein kinase ERK-A OS=Drosophila melanogaster OX=7227 GN=rl PE=1 SV=3	P40417	rl	43 kDa		unknown	0	0
132	TRUE	Empty	Uncharacterized protein OS=Drosophila melanogaster OX=7227 GN=Dmel\CG2064 PE=1 SV=1	A1Z729	Dmel	37 kDa		unknown	0	3
133	TRUE	Empty	FI01658p OS=Drosophila melanogaster OX=7227 GN=RpL23A PE=1 SV=1	Q9W0A8	RpL23A	29 kDa		unknown	0	6
134	TRUE	Empty	60S ribosomal protein L23 OS=Drosophila melanogaster OX=7227 GN=RpL23 PE=1 SV=2	P48159	RpL23	15 kDa		unknown	0	6
135	TRUE	Empty	GEO07602p1 OS=Drosophila melanogaster OX=7227 GN=RpL12 PE=1 SV=1	Q9W1B9	RpL12	18 kDa		unknown	0	6
136	TRUE	Empty	Proteasome subunit alpha type-7-1 OS=Drosophila melanogaster OX=7227 GN=Prosalpha4 PE=1 SV=2	P22769	Prosalpha4	28 kDa		unknown	0	5
137	TRUE	Empty	AT13539p OS=Drosophila melanogaster OX=7227 GN=BcDNA:AT13539 PE=1 SV=1	Q9VPP7	BcDNA	16 kDa		unknown	0	4
138	TRUE	Empty	DSec61alpha OS=Drosophila melanogaster OX=7227 GN=Sec61alpha PE=1 SV=1	Q8STG9	Sec61alpha	52 kDa		unknown	0	6
139	TRUE	Empty	Nuclear migration protein NudC OS=Drosophila melanogaster OX=7227 GN=nudC PE=1 SV=2	Q9VVA6	nudC	38 kDa		unknown	0	2
140	TRUE	Empty	Regulatory particle triple-A ATPase 4 OS=Drosophila melanogaster OX=7227 GN=Rpt4 PE=1 SV=3	Q9W414	Rpt4	45 kDa		unknown	0	3
141	TRUE	Empty	Sodium/potassium-transporting ATPase subunit alpha OS=Drosophila melanogaster OX=7227 GN=Atpalpha PE=1 SV=1	A0A0B4KGG8 (+2)	Atpalpha	111 kDa		unknown	0	3
142	TRUE	Empty	T-complex protein 1 subunit delta OS=Drosophila melanogaster OX=7227 GN=CCT4 PE=1 SV=1	Q9VK69	CCT4	57 kDa		unknown	0	2
143	TRUE	Empty	40S ribosomal protein SA OS=Drosophila melanogaster OX=7227 GN=sta PE=1 SV=3	P38979	sta	30 kDa		unknown	0	1
144	TRUE	Empty	Viking, isoform A OS=Drosophila melanogaster OX=7227 GN=vkg PE=1 SV=1	Q9VMV5	vkg	194 kDa		unknown	4	1
145	TRUE	Empty	60S ribosomal protein L22 OS=Drosophila melanogaster OX=7227 GN=RpL22 PE=1 SV=2	P50887	RpL22	31 kDa		unknown	0	2
146	TRUE	Empty	GEO07301p1 OS=Drosophila melanogaster OX=7227 GN=RpS15 PE=1 SV=1	Q7JZW2	RpS15	17 kDa		unknown	0	3
147	TRUE	Empty	26S proteasome regulatory complex subunit p48A OS=Drosophila melanogaster OX=7227 GN=Rpt3 PE=1 SV=1	Q9V405	Rpt3	47 kDa		unknown	0	4
148	TRUE	Empty	Chaperonin containing TCP1 subunit 6 OS=Drosophila melanogaster OX=7227 GN=CCT6 PE=1 SV=1	Q9VXQ5	CCT6	58 kDa		unknown	0	4
149	TRUE	Empty	Chaperonin containing TCP1 subunit 5, isoform A OS=Drosophila melanogaster OX=7227 GN=CCT5 PE=1 SV=1	Q7KKI0	CCT5	59 kDa		unknown	0	5
150	TRUE	Empty	RE11562p OS=Drosophila melanogaster OX=7227 GN=Cndp2 PE=1 SV=1	Q8MT58	Cndp2	53 kDa		unknown	0	0
151	TRUE	Empty	Gustavus, isoform G OS=Drosophila melanogaster OX=7227 GN=gus PE=4 SV=1	A0A0B4K6X3 (+1)	gus	32 kDa		unknown	0	5
152	TRUE	Empty	Squid, isoform E OS=Drosophila melanogaster OX=7227 GN=sqd PE=4 SV=1	A0A0B4K6U6 (+1)	sqd	33 kDa		unknown	0	5
153	TRUE	Empty	Serine/threonine-protein kinase grp OS=Drosophila melanogaster OX=7227 GN=grp PE=1 SV=2	O61661 (+1)	grp	58 kDa		unknown	0	0
154	TRUE	Empty	Ubiquitin activating enzyme 1, isoform C OS=Drosophila melanogaster OX=7227 GN=Uba1 PE=1 SV=1	A0A0B4KF46 (+1)	Uba1	112 kDa		unknown	0	1
155	TRUE	Empty	T-complex protein 1 subunit eta OS=Drosophila melanogaster OX=7227 GN=CCT7 PE=1 SV=2	Q9VHL2	CCT7	59 kDa		unknown	0	3
156	TRUE	Empty	Ectoderm-expressed 4, isoform D OS=Drosophila melanogaster OX=7227 GN=Sarm PE=1 SV=1	A8JNN1 (+5)	Sarm	178 kDa		unknown	0	4
157	TRUE	Empty	Elongation factor Tu OS=Drosophila melanogaster OX=7227 GN=mEFTu1 PE=1 SV=1	A1Z9E3	mEFTu1	54 kDa		unknown	0	4
158	TRUE	Empty	CAD protein OS=Drosophila melanogaster OX=7227 GN=r PE=1 SV=3	P05990 (+1)	r	247 kDa		unknown	0	3
159	TRUE	Empty	MIP08013p1 OS=Drosophila melanogaster OX=7227 GN=Mpcp2 PE=1 SV=1	Q0E8E8	Mpcp2	39 kDa		unknown	0	3
160	TRUE	Empty	40S ribosomal protein S25 OS=Drosophila melanogaster OX=7227 GN=RpS25 PE=1 SV=3	P48588	RpS25	13 kDa		unknown	0	4
161	TRUE	Empty	RE07815p OS=Drosophila melanogaster OX=7227 GN=Ugt317A1 PE=1 SV=3	Q9W228	Ugt317A1	59 kDa		unknown	0	4
162	TRUE	Empty	ATP synthase subunit d, mitochondrial OS=Drosophila melanogaster OX=7227 GN=ATPsynD PE=3 SV=1	A0A0B4LHL7 (+1)	ATPsynD	20 kDa		unknown	0	3
163	TRUE	Empty	40S ribosomal protein S13 OS=Drosophila melanogaster OX=7227 GN=RpS13 PE=1 SV=3	Q03334 (+1)	RpS13	17 kDa		unknown	0	3
164	TRUE	Empty	Prohibitin OS=Drosophila melanogaster OX=7227 GN=l(2)37Cc PE=1 SV=1	A0A023GQA5 (+1)	l	30 kDa		unknown	0	3
165	TRUE	Empty	Regulatory particle non-ATPase 3, isoform B OS=Drosophila melanogaster OX=7227 GN=Rpn3 PE=1 SV=1	M9PG62 (+1)	Rpn3	56 kDa		unknown	0	4
166	TRUE	Empty	60S ribosomal protein L9 OS=Drosophila melanogaster OX=7227 GN=RpL9 PE=1 SV=2	P50882 (+1)	RpL9	21 kDa		unknown	0	3
167	TRUE	Empty	DNA damage-binding protein 1 OS=Drosophila melanogaster OX=7227 GN=pic PE=1 SV=1	Q9XYZ5	pic	126 kDa		unknown	0	3
168	TRUE	Empty	LD13662p OS=Drosophila melanogaster OX=7227 GN=RpS9 PE=1 SV=1	C6SUW3 (+1)	RpS9	23 kDa		unknown	0	4
169	TRUE	Empty	Protein clueless OS=Drosophila melanogaster OX=7227 GN=clu PE=1 SV=1	A1ZAB5	clu	161 kDa		unknown	0	3
170	TRUE	Empty	LD15904p OS=Drosophila melanogaster OX=7227 GN=pzg PE=1 SV=1	Q9VP57	pzg	105 kDa		unknown	0	3
171	TRUE	Empty	60S ribosomal protein L31 OS=Drosophila melanogaster OX=7227 GN=RpL31 PE=1 SV=1	Q9V597	RpL31	15 kDa		unknown	0	3
172	TRUE	Empty	RE25263p OS=Drosophila melanogaster OX=7227 GN=RpL30 PE=1 SV=1	Q9VJ19	RpL30	12 kDa		unknown	0	3
173	TRUE	Empty	FI09602p OS=Drosophila melanogaster OX=7227 GN=GH07925p PE=1 SV=1	Q9VVU1	GH07925p	45 kDa		unknown	0	3
174	TRUE	Empty	Dihydropyrimidine dehydrogenase [NADP(+)] OS=Drosophila melanogaster OX=7227 GN=su(r) PE=1 SV=2	Q9W374	su	111 kDa		unknown	0	0
175	TRUE	Empty	RuvB-like helicase 1 OS=Drosophila melanogaster OX=7227 GN=pont PE=1 SV=1	Q9VH07	pont	50 kDa		unknown	0	3
176	TRUE	Empty	Eukaryotic translation initiation factor 2 subunit 1 OS=Drosophila melanogaster OX=7227 GN=eIF2alpha PE=2 SV=1	P41374 (+1)	eIF2alpha	39 kDa		unknown	0	3
177	TRUE	Empty	Aspartyl-tRNA synthetase, isoform A OS=Drosophila melanogaster OX=7227 GN=AspRS PE=1 SV=1	Q7K0E6	AspRS	59 kDa		unknown	0	3
178	TRUE	Empty	DNA-directed RNA polymerase I subunit RPA2 OS=Drosophila melanogaster OX=7227 GN=RpI135 PE=1 SV=2	P20028	RpI135	128 kDa		unknown	0	3
179	TRUE	Empty	Uncharacterized protein, isoform B OS=Drosophila melanogaster OX=7227 GN=cg7461 PE=1 SV=2	A1ZBJ2	cg7461	68 kDa		unknown	0	3
180	TRUE	Empty	Uncharacterized protein, isoform B OS=Drosophila melanogaster OX=7227 GN=CK02656 PE=1 SV=2	Q9VPJ9	CK02656	78 kDa		unknown	0	2
181	TRUE	Empty	Dilute class unconventional myosin, isoform C OS=Drosophila melanogaster OX=7227 GN=didum PE=1 SV=1	A1Z6Z8 (+1)	didum	208 kDa		unknown	2	0
182	TRUE	Empty	RE74312p OS=Drosophila melanogaster OX=7227 GN=Sar1 PE=1 SV=1	Q9VD29	Sar1	22 kDa		unknown	0	2
183	TRUE	Empty	Gelsolin, isoform J OS=Drosophila melanogaster OX=7227 GN=Gel PE=4 SV=1	A0A0C4DHG2 (+2)	Gel	88 kDa		unknown	2	0
